# Supplementary material for: Surface Structuring of the CP Titanium by Ultrafast Laser Pulses
Source: MDPI journal article supplement (doi:10.3390/app14083164), 2024-04-09
Supplement: s1 [file s1]

## **Surface structuring of the CP titanium by ultrafast laser pulses**

Kipkurui Ronoh<sup>1,2,3\*</sup>, Jan Novotný<sup>4</sup>, Libor Mrňa<sup>4</sup>, Alexandr Knápek<sup>4</sup>, Dinara Sobola<sup>1,2,,5\*</sup>

<sup>1</sup> Central European Institute of Technology, Brno University of Technology, Purkyňova 123, 612 00 Brno, Czech Republic;

<sup>2</sup> Department of Physics, Faculty of Electrical Engineering and Communication, Brno University of Technology, Technická 2848/8, 616 00 Brno, Czech Republic;

<sup>3</sup> Department of Mechanical Engineering, Dedan Kimathi University of Technology, Private Bag -10143, Dedan Kimathi, Nyeri, Kenya.

<sup>4</sup> Institute of Scientific Instruments, Czech Academy of Sciences, Královopolská 147, 612 64 Brno, Czech Republic;

<sup>5</sup> Institute of Physics of Materials, Czech Academy of Sciences, Žitkova 22, 61662 Brno, Czech Republic;

\*Corresponding Authors: Kipkurui Ronoh; Email: [kipkurui.ronoh@ceitec.vutbr.cz](mailto:kipkurui.ronoh@ceitec.vutbr.cz) and Dinara Sobola; Email: [sobola@vut.cz](mailto:sobola@vut.cz)

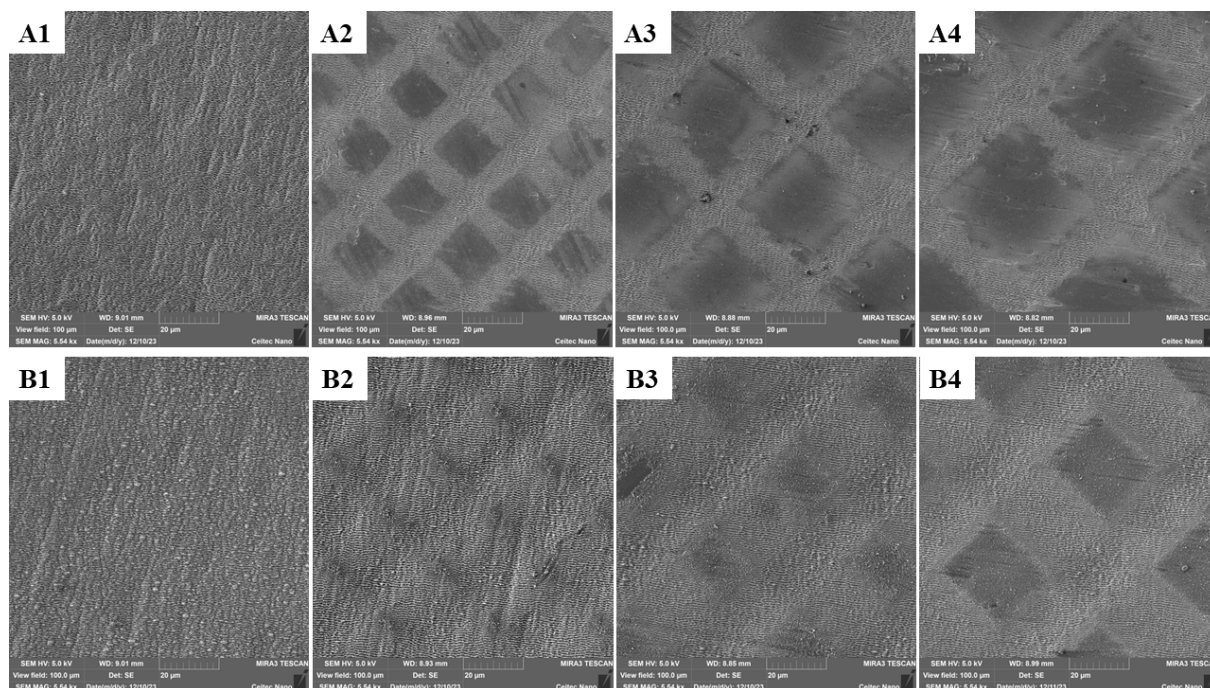

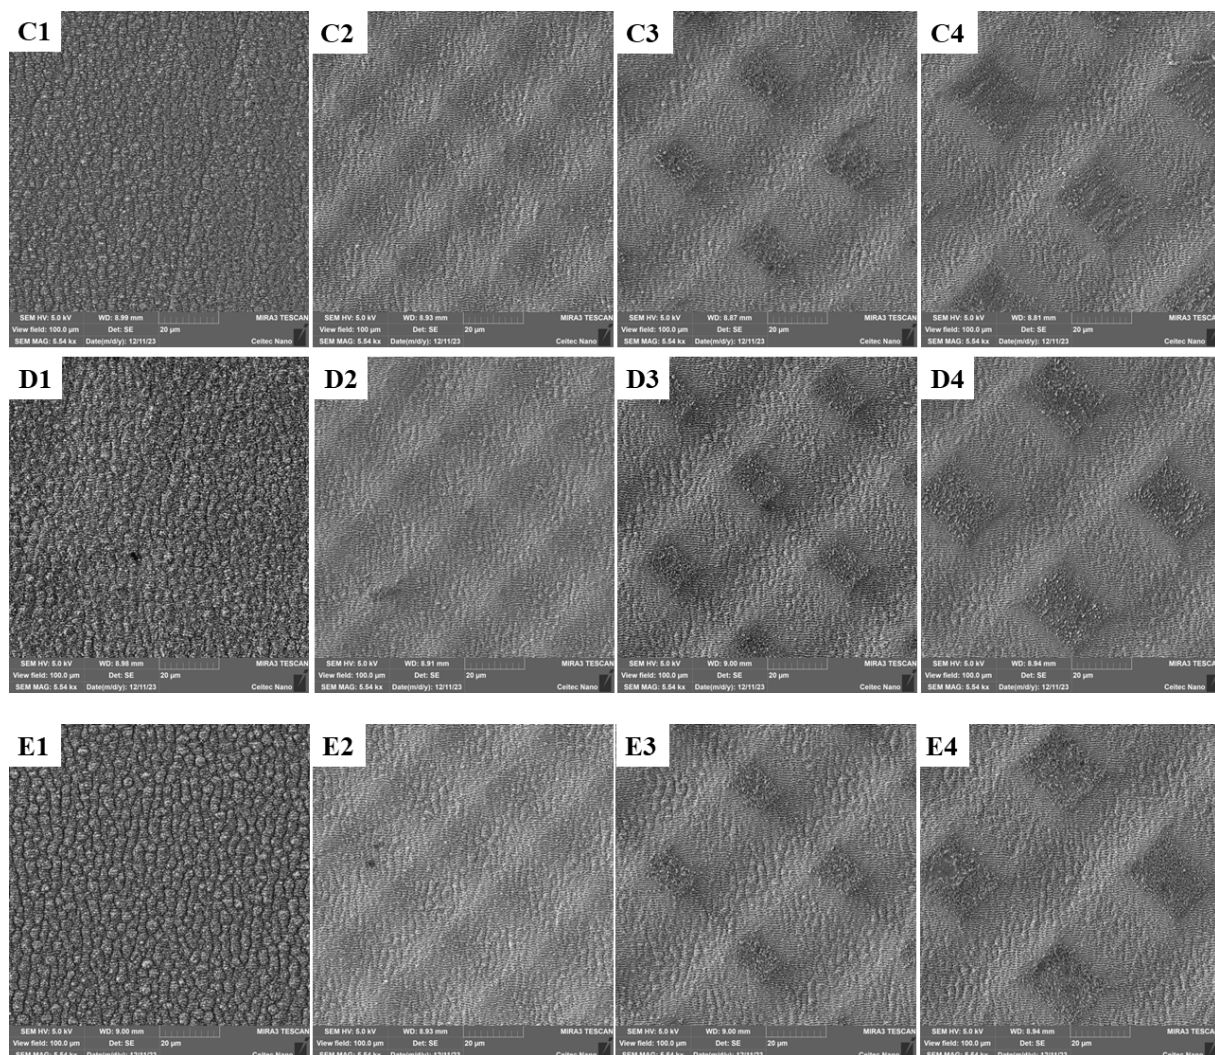

**Figure S1:** SEM micrographs of ps laser-structured CP Ti surfaces of regions shown on each image. The laser processing parameters indicated in Table 1 were applied to these regions.

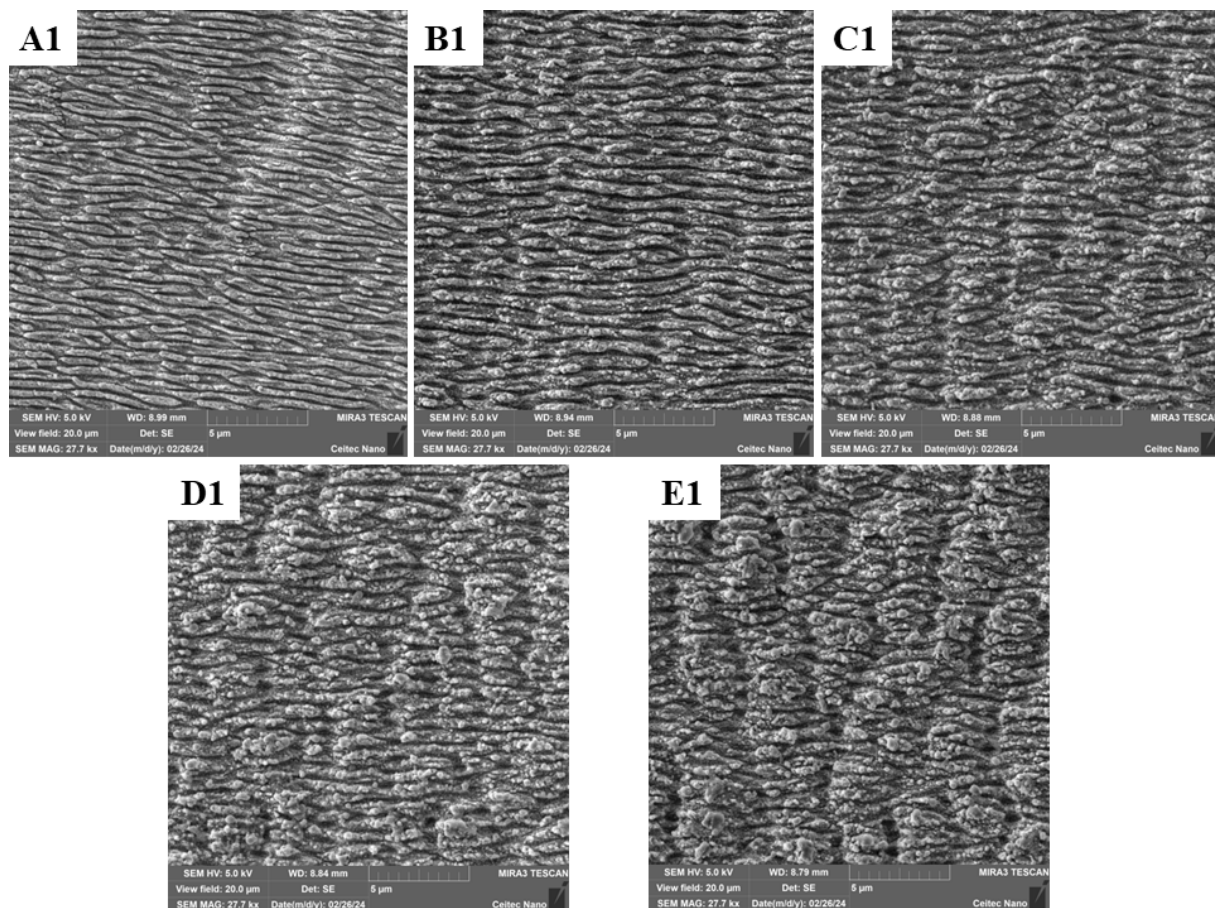

**Figure S2:** SEM images showing LIPSS on the laser-processed CP Ti surfaces of regions shown on each image after immersion. These regions were processed as per the parameters shown in Table 1.

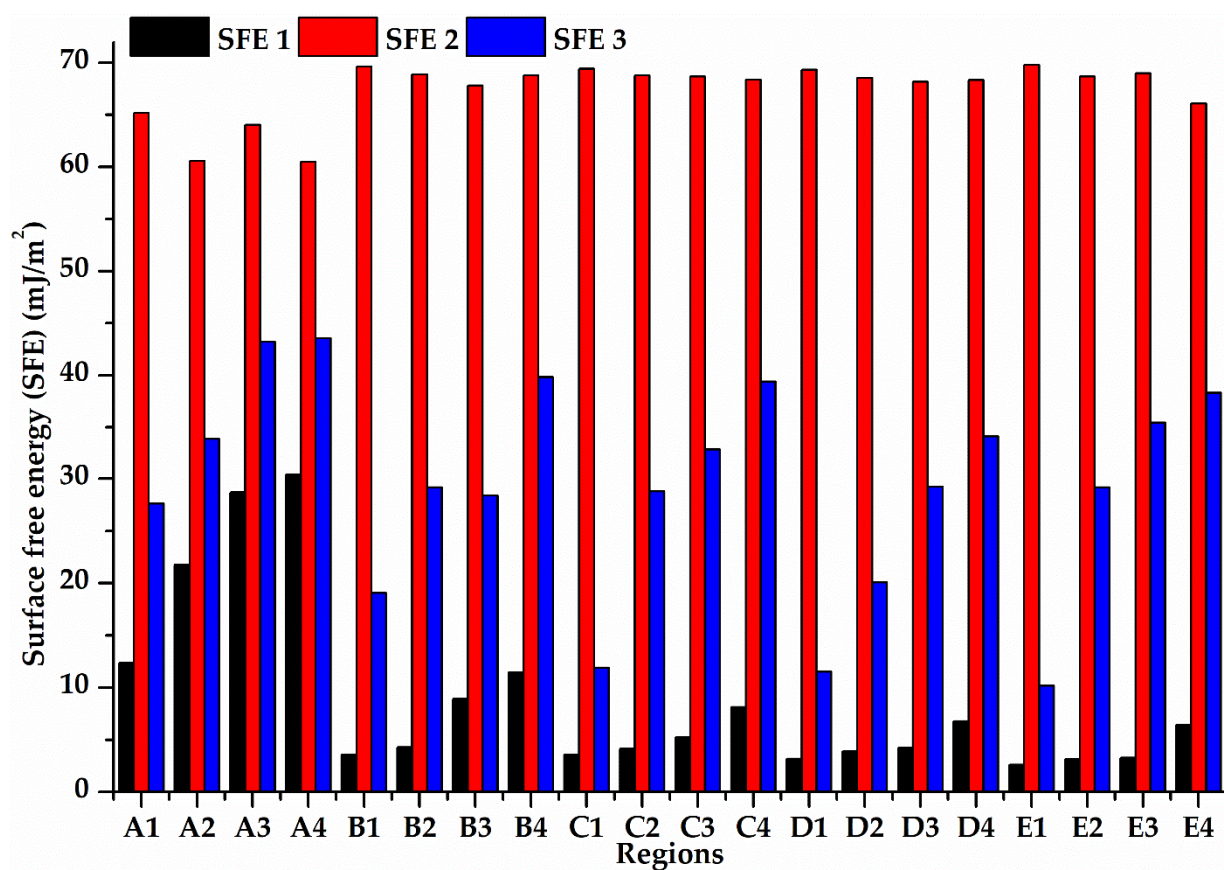

**Figure S3:** Surface free energy for laser-structured surfaces (A1, A2, A3, ..., E3, and E4) of the CP Ti before immersion (SFE 1), immediately after immersion (SFE 2) and 10 days after immersion (SFE 3).
